# Supplementary material
Source: PubMed Central journal article supplement (PMC4215859)
Supplement: ac501309s_si_001.pdf [file ac501309s_si_001.pdf]

## Supporting Information

### **Application of screening experimental designs to assess chromatographic isotope effect upon isotope-coded derivatization for quantitative liquid chromatography–mass spectrometry**

Szabolcs Szarka,<sup>†</sup> Katalin Prokai-Tatrai,<sup>†,‡</sup> and Laszlo Prokai<sup>\*,†</sup>

<sup>†</sup> Department of Pharmacology and Neuroscience, University of North Texas Health Science Center, 3500 Camp Bowie Boulevard, Fort Worth, TX 76107-2699, United States

<sup>‡</sup> Department of Pharmaceutical Sciences, UNT System College of Pharmacy, University of North Texas Health Science Center, 3500 Camp Bowie Boulevard, Fort Worth, TX 76107-2699, United States

---

**\* Corresponding Author**

Tel.: +1-817-735-2206. Fax: +1-817-735-2118. E-mail: [Laszlo.Prokai@unthsc.edu](mailto:Laszlo.Prokai@unthsc.edu)

**Table S-1. Factors and levels chosen for the asymmetrical and Plackett-Burman experimental designs**

| no. | factor                                     | Levels                |                              |                              |                              |
|-----|--------------------------------------------|-----------------------|------------------------------|------------------------------|------------------------------|
|     |                                            | 1                     | 2                            | 3                            | 4                            |
| 1   | stable isotope labeling <sup>a</sup>       | <i>d</i> <sub>3</sub> | <sup>15</sup> N <sub>2</sub> | <sup>15</sup> N <sub>4</sub> | <sup>13</sup> C <sub>6</sub> |
| 2   | column temperature (°C)                    | 25                    | 50                           | 40                           |                              |
| 3   | gradient time (min)                        | 2                     | 8                            | 4                            |                              |
| 4   | stationary phase chemistry                 | PhenHex <sup>b</sup>  | C18 <sup>c</sup>             |                              |                              |
| 5   | aqueous mobile phase pH                    | 3.3                   | 8.2                          |                              |                              |
| 6   | organic solvent                            | MeOH                  | ACN                          |                              |                              |
| 7   | analyte concentration (μg/mL) <sup>d</sup> | 0.1                   | 1.0                          |                              |                              |

<sup>a</sup>Factor examined only in the asymmetrical design. <sup>b</sup>Phenyl-hexylsilica. <sup>c</sup>Octadecylsilica. <sup>d</sup>Factor examined only in the Plackett-Burman design.

**Table S-2. Asymmetrical experimental design constructed from Addelman's basic plan<sup>25</sup>**

| experiment | isotope labeling             | column temperature (°C) | gradient time (min) | stationary phase <sup>a</sup> | pH  | organic solvent | dummy 1 | dummy 2 | dummy 3 |
|------------|------------------------------|-------------------------|---------------------|-------------------------------|-----|-----------------|---------|---------|---------|
| 1          | <i>d</i> <sub>3</sub>        | 25                      | 8                   | PhenHex                       | 3.3 | MeOH            | -1      | -1      | -1      |
| 2          | <sup>15</sup> N <sub>4</sub> | 50                      | 4                   | PhenHex                       | 3.3 | MeOH            | -1      | 1       | 1       |
| 3          | <sup>15</sup> N <sub>2</sub> | 40                      | 4                   | PhenHex                       | 3.3 | MeOH            | 1       | -1      | 1       |
| 4          | <sup>13</sup> C <sub>6</sub> | 40                      | 2                   | PhenHex                       | 3.3 | MeOH            | 1       | 1       | -1      |
| 5          | <sup>15</sup> N <sub>4</sub> | 40                      | 4                   | PhenHex                       | 8.2 | ACN             | -1      | -1      | -1      |
| 6          | <i>d</i> <sub>3</sub>        | 40                      | 2                   | PhenHex                       | 8.2 | ACN             | -1      | 1       | 1       |
| 7          | <sup>13</sup> C <sub>6</sub> | 50                      | 8                   | PhenHex                       | 8.2 | ACN             | 1       | -1      | 1       |
| 8          | <sup>15</sup> N <sub>2</sub> | 25                      | 4                   | PhenHex                       | 8.2 | ACN             | 1       | 1       | -1      |
| 9          | <sup>15</sup> N <sub>2</sub> | 50                      | 2                   | C18                           | 3.3 | ACN             | -1      | -1      | -1      |
| 10         | <sup>13</sup> C <sub>6</sub> | 25                      | 4                   | C18                           | 3.3 | ACN             | -1      | 1       | 1       |
| 11         | <i>d</i> <sub>3</sub>        | 40                      | 4                   | C18                           | 3.3 | ACN             | 1       | -1      | 1       |
| 12         | <sup>15</sup> N <sub>4</sub> | 40                      | 8                   | C18                           | 3.3 | ACN             | 1       | 1       | -1      |
| 13         | <sup>13</sup> C <sub>6</sub> | 40                      | 4                   | C18                           | 8.2 | MeOH            | -1      | -1      | -1      |
| 14         | <sup>15</sup> N <sub>2</sub> | 40                      | 8                   | C18                           | 8.2 | MeOH            | -1      | 1       | 1       |
| 15         | <sup>15</sup> N <sub>4</sub> | 25                      | 2                   | C18                           | 8.2 | MeOH            | 1       | -1      | 1       |
| 16         | <i>d</i> <sub>3</sub>        | 50                      | 4                   | C18                           | 8.2 | MeOH            | 1       | 1       | -1      |

<sup>a</sup>PhenHex denotes phenylhexylsilica, C18 denotes octadecylsilica

**Table S-3. Plackett-Burman experimental design constructed according to Vander Heyden et al.<sup>26</sup>**

| experiment | analyte conc. ( $\mu\text{g/mL}$ ) | dummy 1 | organic solvent | temperature ( $^{\circ}\text{C}$ ) | dummy 2 | dummy 3 | dummy 4 | pH  | stationary phase <sup>a</sup> | gradient time (min) | dummy 5 |
|------------|------------------------------------|---------|-----------------|------------------------------------|---------|---------|---------|-----|-------------------------------|---------------------|---------|
| 1          | 0.1                                | 1       | MeOH            | 50                                 | 1       | 1       | -1      | 3.3 | PhenHex                       | 2                   | -1      |
| 2          | 1                                  | 1       | ACN             | 25                                 | 1       | 1       | 1       | 3.3 | PhenHex                       | 8                   | 1       |
| 3          | 0.1                                | -1      | ACN             | 50                                 | -1      | 1       | 1       | 8.2 | PhenHex                       | 8                   | -1      |
| 4          | 1                                  | 1       | MeOH            | 50                                 | 1       | -1      | 1       | 8.2 | C18                           | 8                   | -1      |
| 5          | 1                                  | -1      | ACN             | 25                                 | 1       | 1       | -1      | 8.2 | C18                           | 2                   | -1      |
| 6          | 1                                  | -1      | MeOH            | 50                                 | -1      | 1       | 1       | 3.3 | C18                           | 2                   | 1       |
| 7          | 0.1                                | -1      | MeOH            | 25                                 | 1       | -1      | 1       | 8.2 | PhenHex                       | 2                   | 1       |
| 8          | 0.1                                | 1       | MeOH            | 25                                 | -1      | 1       | -1      | 8.2 | C18                           | 8                   | 1       |
| 9          | 0.1                                | 1       | ACN             | 25                                 | -1      | -1      | 1       | 3.3 | C18                           | 2                   | -1      |
| 10         | 1                                  | 1       | ACN             | 50                                 | -1      | -1      | -1      | 8.2 | PhenHex                       | 2                   | 1       |
| 11         | 0.1                                | -1      | ACN             | 50                                 | 1       | -1      | -1      | 3.3 | C18                           | 8                   | 1       |
| 12         | 1                                  | -1      | MeOH            | 25                                 | -1      | -1      | -1      | 3.3 | PhenHex                       | 8                   | -1      |

<sup>a</sup>PhenHex denotes phenylhexylsilica, C18 denotes octadecylsilica column.

**Table S-4. SRM table**

| Analyte                                 | SRM transition | CE (V) |
|-----------------------------------------|----------------|--------|
| ACR-DNPH                                | 235 → 158      | 16     |
| ACR- <sup>13</sup> C <sub>6</sub> -DNPH | 241 → 164      | 16     |
| ACR- <i>d</i> <sub>3</sub> -DNPH        | 238 → 161      | 16     |
| ACR- <sup>15</sup> N <sub>2</sub> -DNPH | 237 → 158      | 16     |
| ACR- <sup>15</sup> N <sub>4</sub> -DNPH | 239 → 160      | 16     |
| HNE-DNPH                                | 335 → 182      | 23     |
| HNE- <sup>13</sup> C <sub>6</sub> -DNPH | 341 → 188      | 23     |
| HNE- <i>d</i> <sub>3</sub> -DNPH        | 338 → 185      | 23     |
| HNE- <sup>15</sup> N <sub>2</sub> -DNPH | 337 → 184      | 23     |
| HNE- <sup>15</sup> N <sub>4</sub> -DNPH | 339 → 185      | 23     |
| MDA-DNPH                                | 235 → 189      | 18     |
| MDA- <sup>13</sup> C <sub>6</sub> -DNPH | 241 → 195      | 18     |
| MDA- <i>d</i> <sub>3</sub> -DNPH        | 238 → 192      | 18     |
| MDA- <sup>15</sup> N <sub>2</sub> -DNPH | 237 → 190      | 18     |
| MDA- <sup>15</sup> N <sub>4</sub> -DNPH | 239 → 192      | 18     |
| ONE-DNPH                                | 333 → 182      | 23     |
| ONE- <sup>13</sup> C <sub>6</sub> -DNPH | 339 → 188      | 23     |
| ONE- <i>d</i> <sub>3</sub> -DNPH        | 336 → 185      | 23     |
| ONE- <sup>15</sup> N <sub>2</sub> -DNPH | 335 → 184      | 23     |
| ONE- <sup>15</sup> N <sub>4</sub> -DNPH | 337 → 185      | 23     |

**Table S-5. Absolut effects of various factors on the retention time difference between light and <sup>15</sup>N<sub>4</sub>-labeled heavy pair of DNPH-derivatives obtained from the Plackett-Burman design. Critical effects were estimated according to Vander Heyden et al.<sup>26</sup>**

| factor                       | MDA   | ACR   | HNE   | ONE                |
|------------------------------|-------|-------|-------|--------------------|
| temperature                  | 0.023 | 0.101 | 0.024 | 0.000              |
| gradient time                | 0.006 | 0.035 | 0.027 | 0.065 <sup>a</sup> |
| stationary phase             | 0.096 | 0.034 | 0.024 | 0.065 <sup>a</sup> |
| pH                           | 0.062 | 0.034 | 0.016 | 0.000              |
| organic solvent              | 0.345 | 0.034 | 0.044 | 0.000              |
| analyte concentration        | 0.272 | 0.036 | 0.065 | 0.000              |
| dummies                      |       |       |       |                    |
| dummy1                       | 0.162 | 0.030 | 0.000 | 0.065              |
| dummy2                       | 0.231 | 0.096 | 0.000 | 0.065              |
| dummy3                       | 0.006 | 0.100 | 0.066 | 0.000              |
| dummy4                       | 0.027 | 0.030 | 0.070 | 0.000              |
| dummy5                       | 0.137 | 0.034 | 0.069 | 0.065              |
| critical effects             |       |       |       |                    |
| <i>E</i> <sub>critical</sub> | 0.362 | 0.171 | 0.136 | 0.129              |
| ME                           | 0.367 | 0.130 | 0.099 | 0.001              |
| SME                          | 0.590 | 0.209 | 0.159 | 0.001              |

<sup>a</sup>Effect is not considered significant because dummy factors (dummy1, 2, and 5) demonstrated the same effect value.

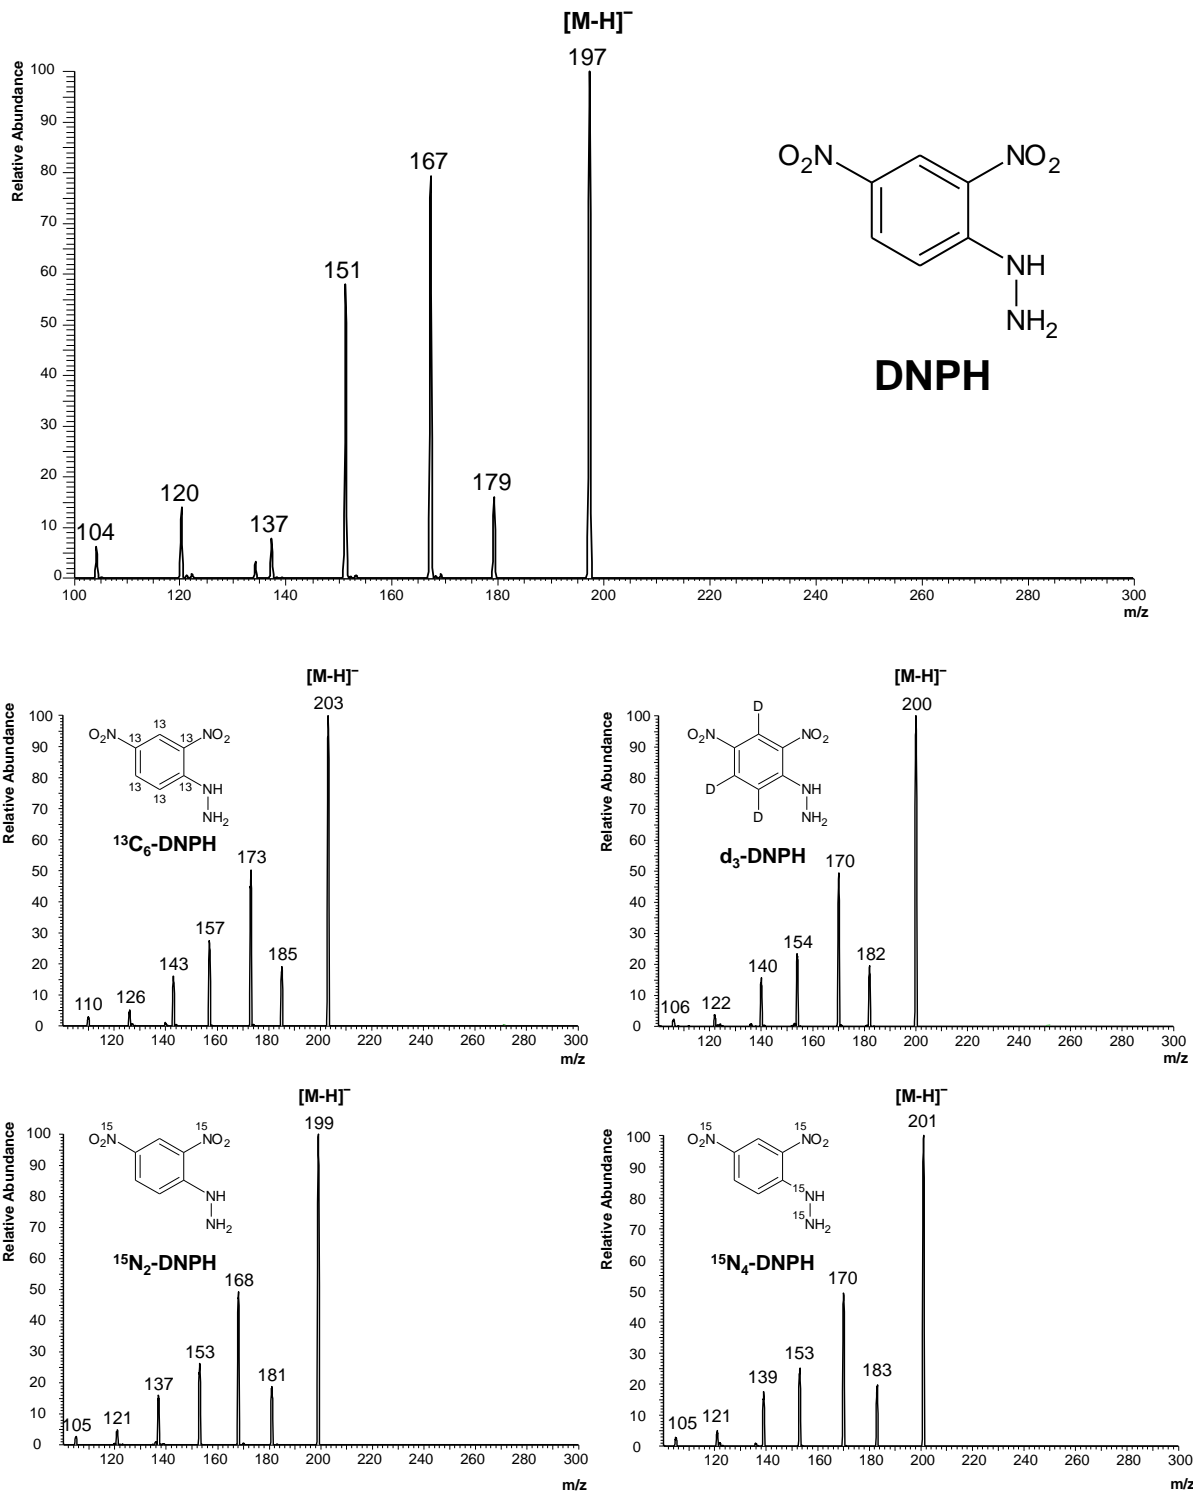

**Figure S-1.** Negative ion mode MS<sup>2</sup> product ion scan spectra and chemical structures of the DNPBs labeled with various stable isotopes on different atoms.

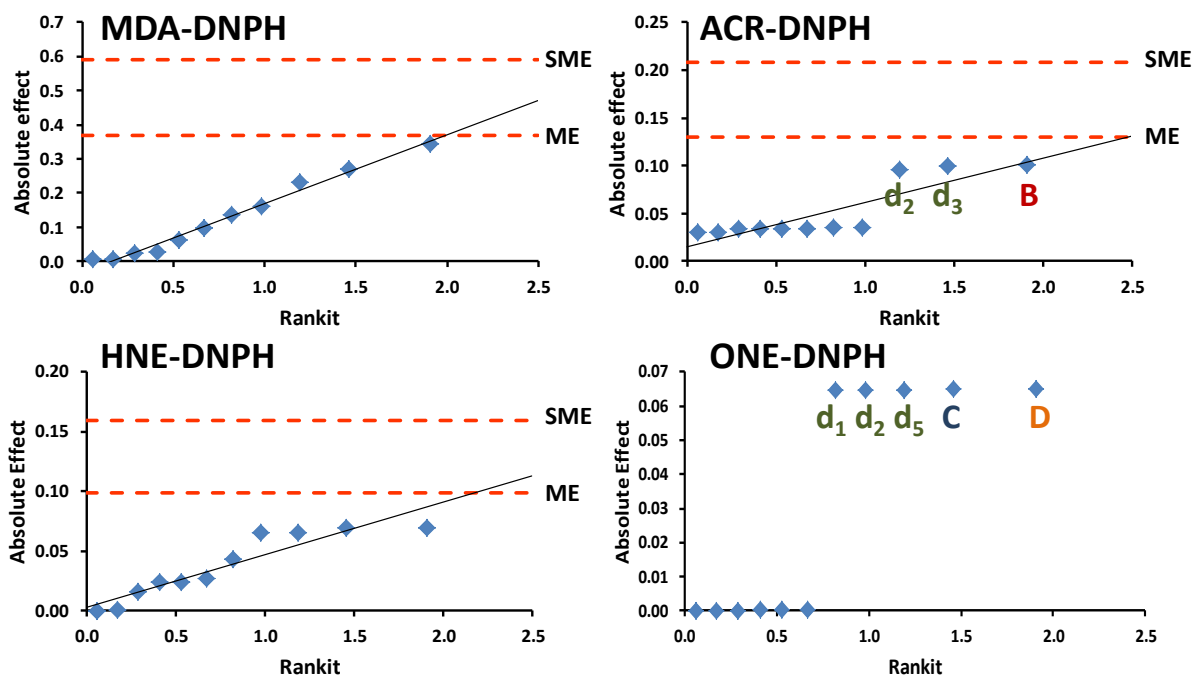

**Figure S-2.** Half-normal probability plots of the absolute effects on the retention time difference measured between light and heavy  $^{15}\text{N}_4$ -labeled aldehyde hydrazones in the Plackett-Burman design with identification of margin of error (ME) and simultaneous margin of error (SME) as critical effects. B, C, D, and  $d_x$  denote column temperature, gradient time, stationary phase chemistry, and dummy factors, respectively.



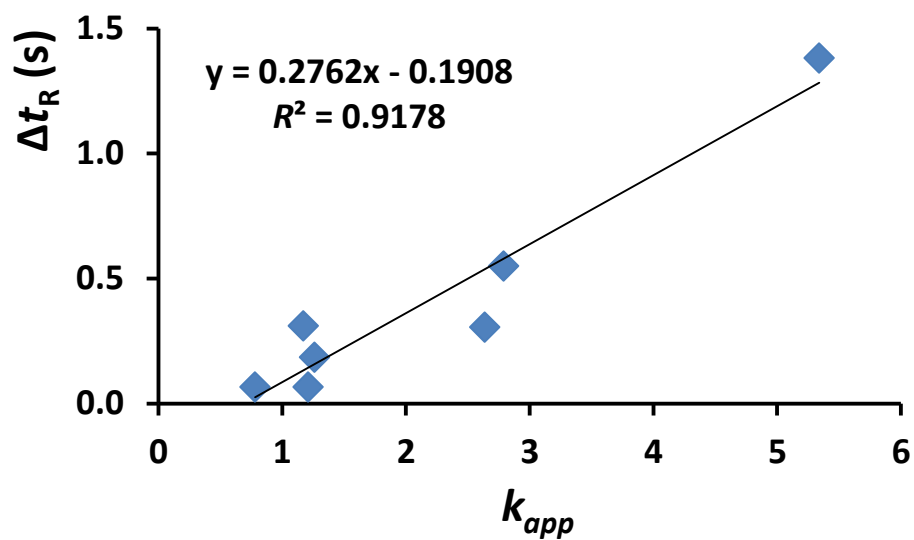

**Figure S-3.** Retention time differences for MDA-DNPH unlabeled and  $d_3$ -labeled isotopologue pair plotted against apparent retention factor ( $k_{app}$ ) obtained by Plackett-Burman design experiments. The legend shows the linear regression equation and correlation coefficient ( $R^2$ ). Note that MDA-DNPH was not detected in five out of 12 experiments, therefore seven data points are shown.

|                     | Exp. | $R_{S_{critical}}$ | Analysis time<br>(min) | Normalized signal response |          |          |          |     |     |
|---------------------|------|--------------------|------------------------|----------------------------|----------|----------|----------|-----|-----|
|                     |      |                    |                        | MDA-DNPH                   | ACR-DNPH | HNE-DNPH | ONE-DNPH |     |     |
| Phenyl-hexyl column | MeOH | pH 3.3             | 1                      | 1.7                        | 6.2      | 66       | 100      | 100 | 100 |
|                     |      |                    | 2                      | 1.1                        | 3.8      | 77       | 91       | 88  | 86  |
|                     |      |                    | 3                      | 1.1                        | 4.1      | 96       | 96       | 94  | 97  |
|                     |      |                    | 4                      | 0.8                        | 3.0      | 100      | 91       | 81  | 82  |
|                     | ACN  | pH 8.2             | 5                      | 4.2                        | 2.1      | 0        | 41       | 30  | 38  |
|                     |      |                    | 6                      | 3.5                        | 2.0      | 0        | 46       | 35  | 38  |
|                     |      |                    | 7                      | 4.4                        | 2.2      | 0        | 36       | 30  | 39  |
|                     |      |                    | 8                      | 4.6                        | 2.4      | 0        | 42       | 32  | 43  |
| C18 column          | ACN  | pH 3.3             | 9                      | 3.2                        | 1.9      | 5        | 70       | 51  | 66  |
|                     |      |                    | 10                     | 4.4                        | 2.5      | 6        | 73       | 59  | 73  |
|                     |      |                    | 11                     | 3.9                        | 2.4      | 8        | 74       | 50  | 74  |
|                     |      |                    | 12                     | 4.6                        | 2.7      | 8        | 72       | 56  | 75  |
|                     | MeOH | pH 8.2             | 13                     | 0.3                        | 3.6      | 1        | 53       | 33  | 48  |
|                     |      |                    | 14                     | 0.3                        | 5.0      | 4        | 50       | 35  | 57  |
|                     |      |                    | 15                     | 0.2                        | 2.9      | 2        | 58       | 30  | 41  |
|                     |      |                    | 16                     | 0.3                        | 3.4      | 2        | 54       | 32  | 48  |

**Figure S-4.** Heat map created from the dataset obtained by the asymmetric experimental design showing important parameters of the LC–MS/MS assay.  $R_{S_{critical}}$  denotes the resolution between the worst-resolved pair of peaks, HNE-DNPH and ONE-DNPH in the present assay; analysis time denotes the retention time of the last-eluting analyte of interest, ONE-DNPH in the present assay; gradient color scale ranging from red to green is assigned to unacceptable/suboptimal and acceptable/optimal values, respectively.

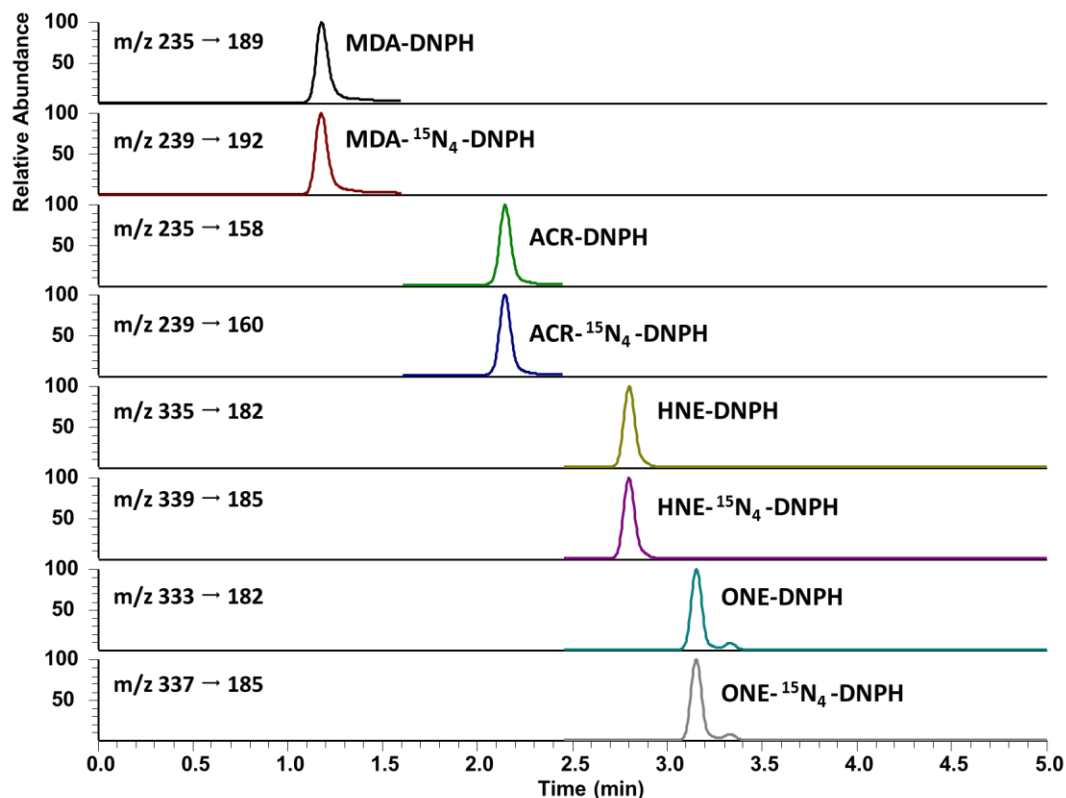

**Figure S-5.** Representative SRM traces of the selected lipid peroxidation-derived reactive aldehyde derivatives (MDA-DNPH, ACR-DNPH, HNE-DNPH, and ONE-DNPH, at a concentration of 1  $\mu\text{g/mL}$  each) and their corresponding  $^{15}\text{N}_4$ -labeled isotopologues obtained by the optimized LC-MS/MS assay. Separation was achieved using a Phenomenex Kinetex phenyl-hexyl column ( $50 \times 2.1$  mm i.d., 5  $\mu\text{m}$  particles) with a mobile phase of (A<sub>1</sub>) 0.1% acetic acid in water and (B<sub>1</sub>) acetonitrile. Gradient profile was 40% B to 100% B in 4 min with a flow rate set at 0.4 mL/min, and the column oven temperature was maintained at 30 °C.

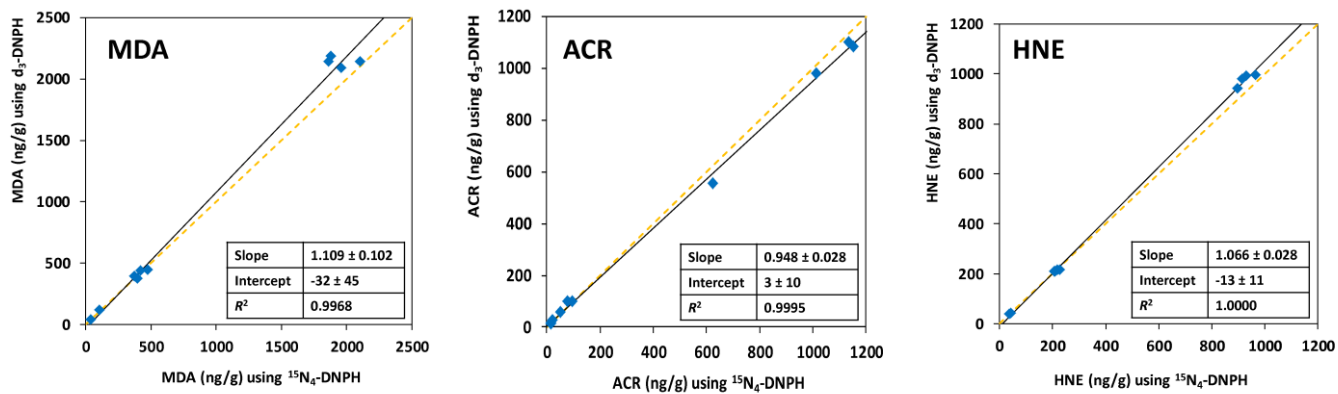

**Figure S-6.** Scatter plots of quantities of selected aldehydes measured in fortified mouse tissue extracts by AIDA using  $d_3$ - or  $^{15}N_4$ -labeling. Solid line represents the Deming regression line with regression statistics included in the inset table (slope and intercept data are expressed as mean  $\pm$  95% confidence limit); the diagonal dashed line is the line of equality indicating the perfect agreement between the methods.
